# Supplementary material for: Curcumin Reduces Cognitive Deficits by Inhibiting Neuroinflammation through the Endoplasmic Reticulum Stress Pathway in Apolipoprotein E4 Transgenic Mice
Source: PubMed Central journal article supplement — ACS Omega. 2021 Mar 2;6(10):6654–62. doi: 10.1021/acsomega.0c04810 (PMC7970496; doi:10.1021/acsomega.0c04810), 2021-03-02
Supplement: ao0c04810_si_001.pdf [file ao0c04810_si_001.pdf]

## Supplementary materials

### **Curcumin rescues cognitive deficits by inhibiting neuroinflammation through the endoplasmic reticulum stress pathway in apolipoprotein E4 transgenic mice**

Jiejian Kou<sup>1,a</sup>, Minghui Wang<sup>1,a</sup>, Junzhuo Shi<sup>a</sup>, Haiyu Zhang<sup>a</sup>, Xiaohui Pu<sup>a</sup>, Shiyong Song<sup>a</sup>, Cuiling Yang<sup>b</sup>, Yi Yan<sup>c,d</sup>, Yvonne Döring<sup>c,d,e</sup>, Xinmei Xie<sup>\*,a</sup>, Xiaobin Pang<sup>\*,a</sup>

<sup>a</sup> School of Pharmacy, Henan University, Kaifeng 475004, China.

<sup>b</sup> State Key Laboratory of Crop Stress Adaptation and Improvement, Henan University, Kaifeng 475004, China.

<sup>c</sup> Institute for Cardiovascular Prevention (IPEK), Ludwig-Maximilians-University Munich, Munich, Germany.

<sup>d</sup> DZHK (German Centre for Cardiovascular Research), partner site Munich Heart Alliance, Munich, Germany.

<sup>e</sup> Department of Angiology, Swiss Cardiovascular Center, Inselspital, Bern University Hospital, University of Bern, Switzerland

\* Corresponding authors at: School of Pharmacy, Henan University, Kaifeng 475004, China.

E-mails: pxb@vip.henu.edu.cn, xxm@vip.henu.edu.cn.

<sup>1</sup> The first two authors equally contributed to this work.

| Item         | Description                                                               | Page number |
|--------------|---------------------------------------------------------------------------|-------------|
| Figure S. 1  | Chemical structure of curcumin                                            | S3          |
| Figure S.2   | Effect of curcumin on body weight in mice                                 | S3          |
| Figure S.3   | The other two repeats of Western Expression of p65                        | S4          |
| Figure S.4 A | The other two repeats of Western Expression of GRP78 and IRE1 $\alpha$    | S5          |
| Figure S.4 B | The two repeats of IHC Expression of GRP78 and IRE1 $\alpha$              | S5          |
| Figure S.5   | Plaque burden developed in ApoE4-Tg mice.                                 | S6          |
| Figure S.6 A | The representative image and quantification analysis of P-PERK expression | S7          |
| Figure S.6 B | The other two repeats of Western Expression of P-PERK                     | S7          |

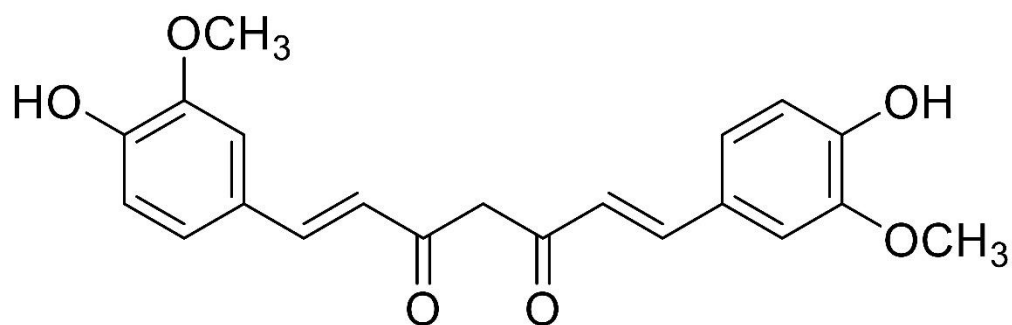

Figure S. 1. Chemical structure of curcumin

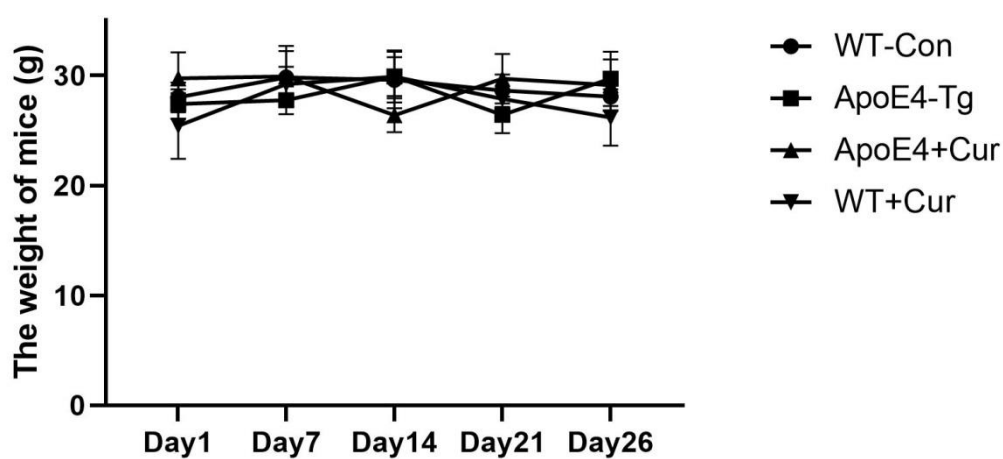

Figure S.2 Effect of curcumin on body weight in mice

During curcumin treatment, the weigh of mice was stable and recorded once a week. Data are expressed as the mean  $\pm$ S.E.M. n=8.

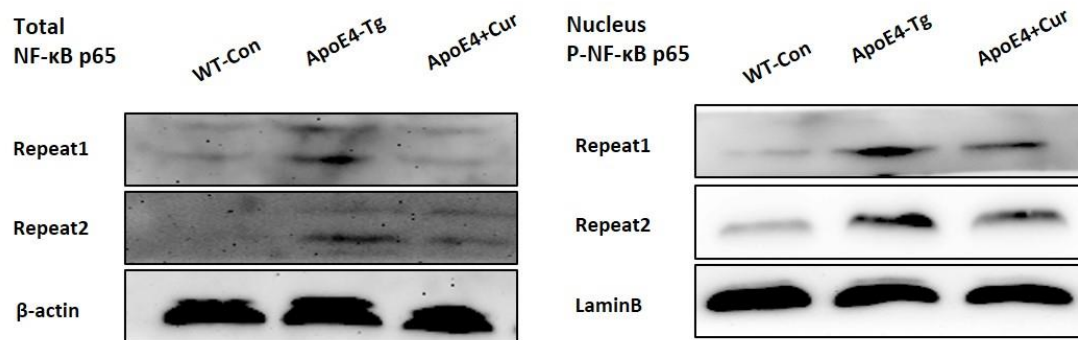

**Figure S.3** The other two repeats of Western Expression of NF-κB p65 and p-NF-κB. The expression of NF-κB p65 and p-NF-κB in the total and nuclear fractions were determined by Western blotting analysis.

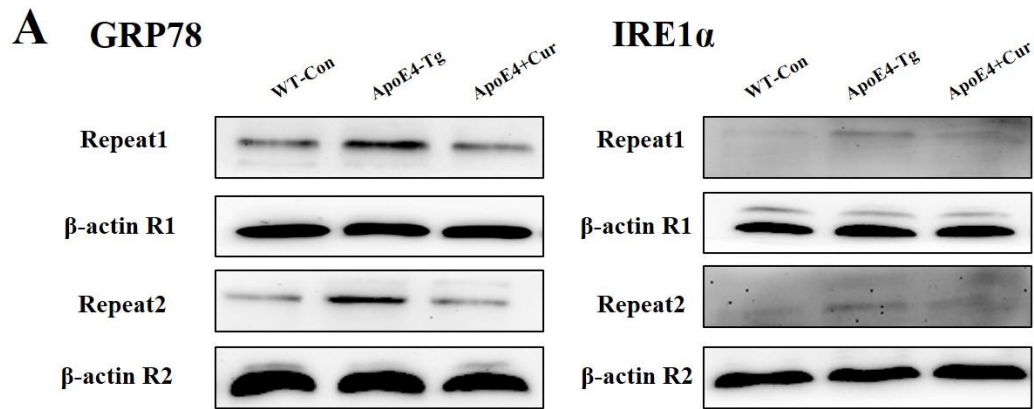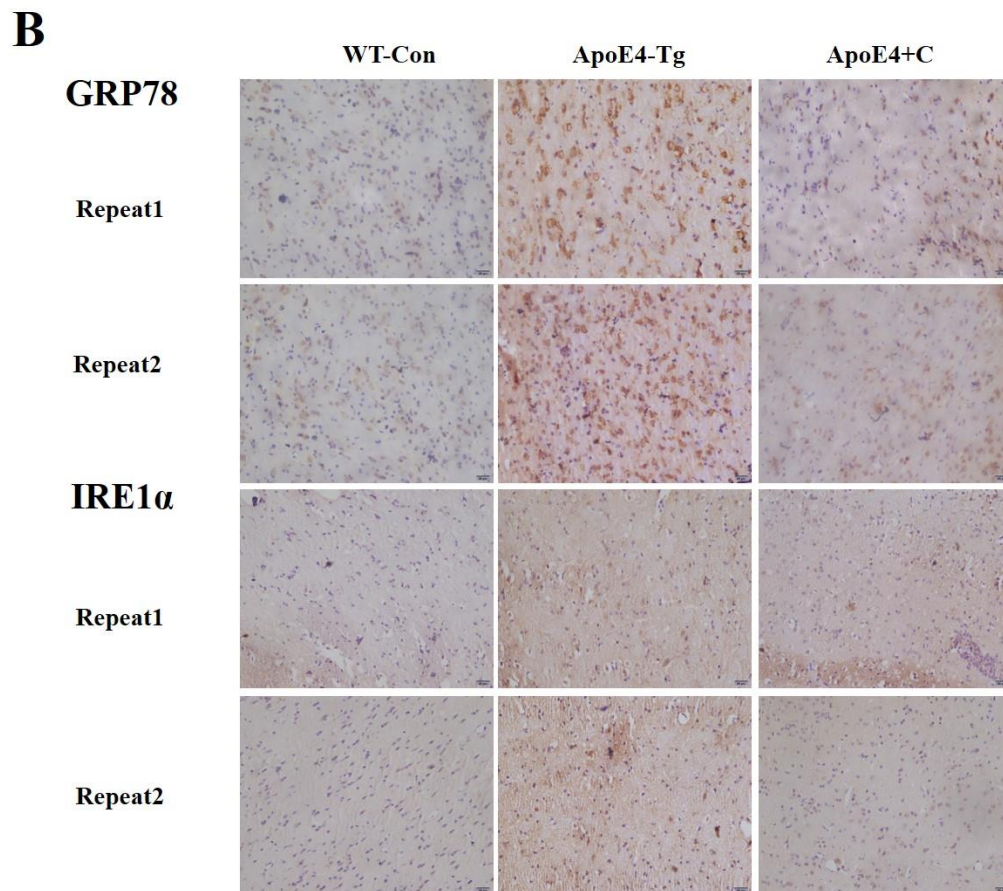

**Figure S.4 A** The other two repeats of Western Expression of GRP78 and IRE1 $\alpha$  were detected through Western blotting using specific antibodies in mouse brain tissue. **Figure S.4 B** The two repeats of IHC Expression of GRP78 and IRE1 $\alpha$  in WT and ApoE4 mice was determined by immunohistochemistry.

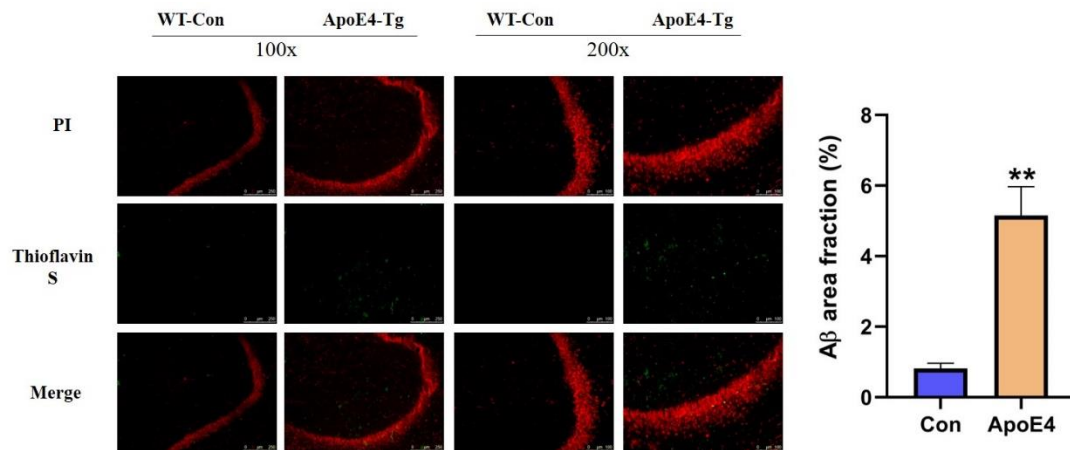

**Figure S.5** Plaque burden developed in ApoE4-Tg mice. Representative images were chosen from each experimental group, Scale bar = 250  $\mu$ m and 100  $\mu$ m

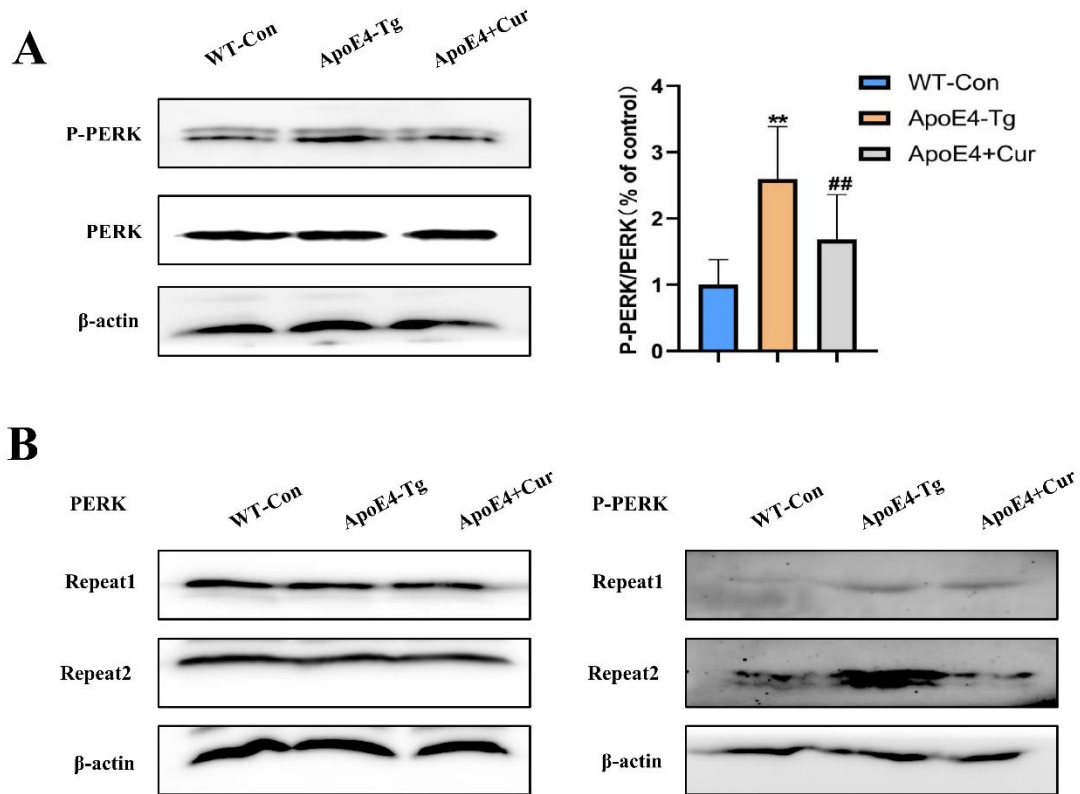

**Figure S.6 A** The representative image and quantification analysis showed P-PERK expression was enhanced in ApoE4-Tg mice, which could be reduced by curcumin treatment.

**Figure S.6 B** The other two repeats of Western Expression of P-PERK were detected through Western blotting using specific antibodies in mouse brain tissue.
